# Supplementary figures and images for: PTEN deficiency permits the formation of pancreatic cancer in the absence of autophagy
Source: PubMed Central journal article supplement — Cell Death Differ. 2017 Jan 20;24(7):1303–4. doi: 10.1038/cdd.2016.120 (PMC5520160; doi:10.1038/cdd.2016.120), 2017-01-20

A)

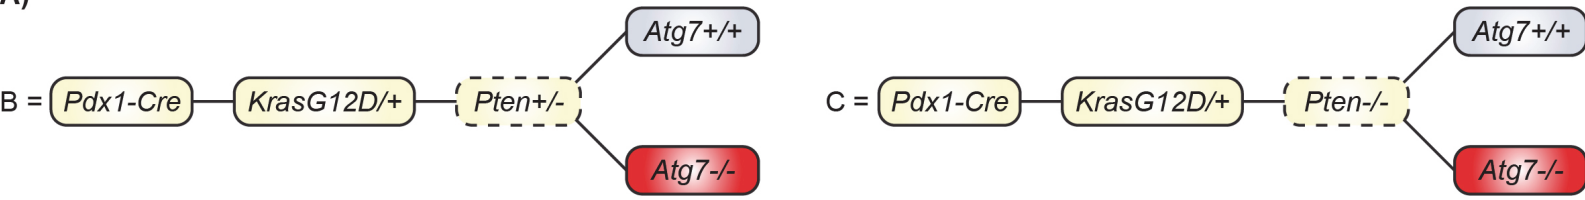

B)

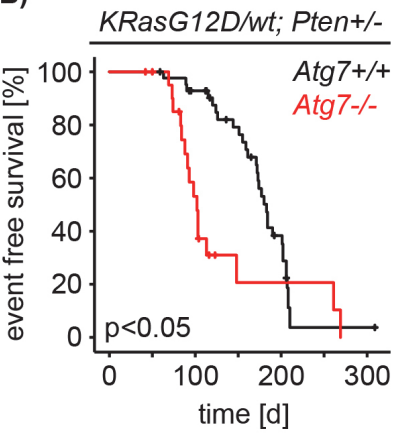

|                | events(total) | median  |
|----------------|---------------|---------|
| <i>Atg7+/+</i> | 32(42)        | 180+/-5 |
| <i>Atg7-/-</i> | 16(22)        | 102+/-5 |

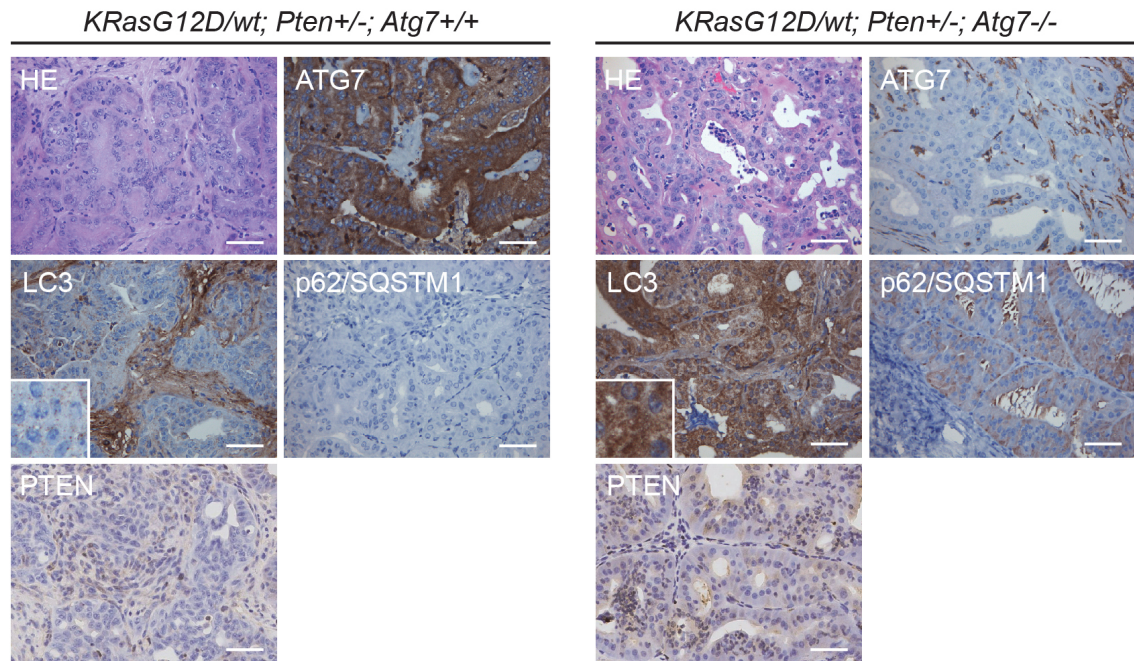

C)

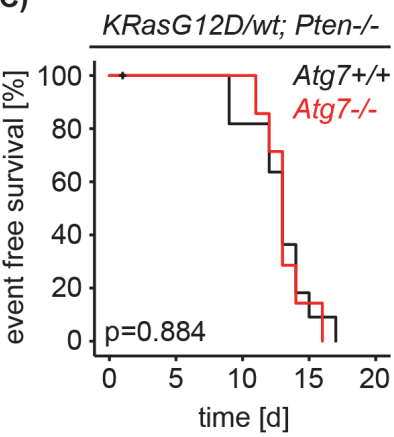

|                | events(total) | median |
|----------------|---------------|--------|
| <i>Atg7+/+</i> | 11(12)        | 13+/-1 |
| <i>Atg7-/-</i> | 7(7)          | 13+/-0 |

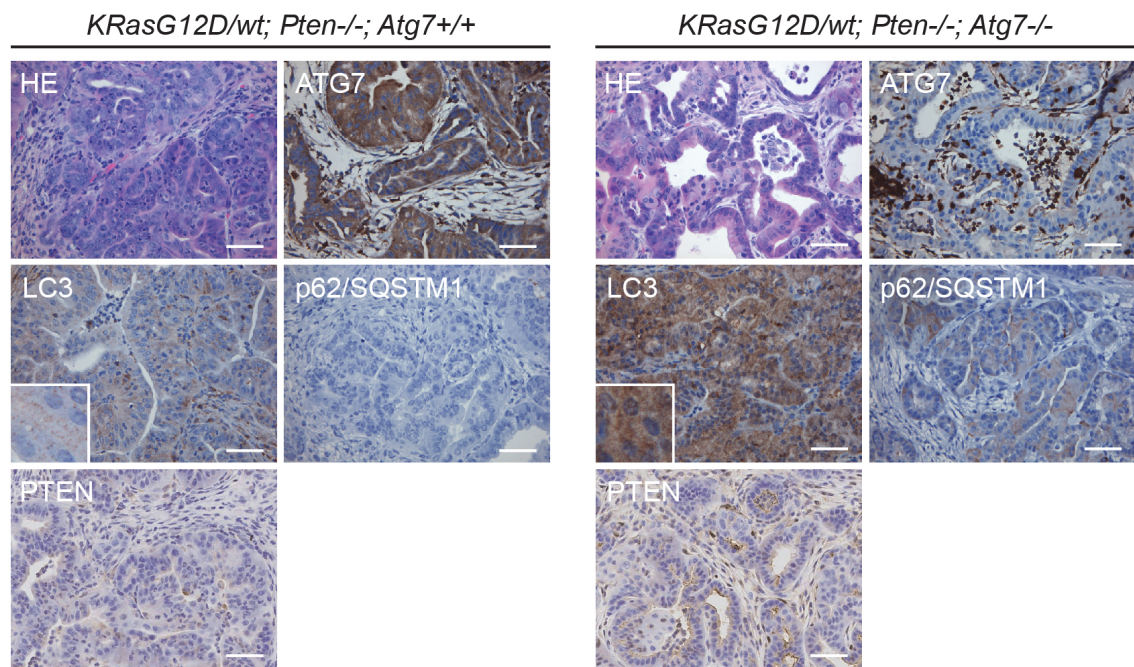

Supplement: cdd2016120x1.pdf [file cdd2016120x1.pdf]
